# Supplementary material for: Evaluation of the Effectiveness of Geogrids Manufactured from Recycled Plastics for Slope Stabilization—A Case Study
Source: MDPI journal article supplement (doi:10.3390/polym16081151), 2024-04-19
Supplement: s1 [file s1]

# Evaluation of the Effectiveness of Geogrids Manufactured from Recycled Plastics for Slope Stabilization—A Case Study

Lenin Vicuña <sup>1</sup>, Ximena Jaramillo-Fierro <sup>2,\*</sup>, Paúl Eduardo Cuenca <sup>1</sup>, Brenda Godoy-Paucar <sup>3</sup>, Jorge Daniel Inga-Lafebre <sup>1</sup>, José Luis Chávez <sup>4</sup>, Juan Fernando García <sup>2</sup>, Diana Guaya <sup>2</sup> and Juan Diego Febres <sup>1</sup>

<sup>1</sup> Departamento de Producción, Facultad de Ciencias Exactas y Naturales, Universidad Técnica Particular de Loja, San Cayetano Alto, Loja 1101608, Ecuador; lvicuna@utpl.edu.ec (L.V.); pecuenca2@utpl.edu.ec (P.E.C.); jdinga@utpl.edu.ec (J.D.I.-L.); jdfebres@utpl.edu.ec (J.D.F.)

<sup>2</sup> Departamento de Química, Facultad de Ciencias Exactas y Naturales, Universidad Técnica Particular de Loja, San Cayetano Alto, Loja 1101608, Ecuador; jfgarcia@utpl.edu.ec (J.F.G.); deguaya@utpl.edu.ec (D.G.)

<sup>3</sup> Carrera de Ingeniería Industrial, Facultad de Ciencias Exactas y Naturales, Universidad Técnica Particular de Loja, San Cayetano Alto, Loja 1101608, Ecuador; bngodoy@utpl.edu.ec

<sup>4</sup> Departamento de Ingeniería Civil, Facultad de Ingenierías y Arquitectura, Universidad Técnica Particular de Loja, San Cayetano Alto, Loja 1101608, Ecuador; jlchavez3@utpl.edu.ec

\* Correspondence: xvjaramillo@utpl.edu.ec; Tel.: +593-7-3701444

**Table S1 Anova table for tensile properties of PP/HDPE Composites**

Maximum\_Deformation\_Ten

|                | Sum of Squares | df | Mean Square | F       | Sig. |
|----------------|----------------|----|-------------|---------|------|
| Between Groups | 116.325        | 4  | 29.081      | 255.623 | .000 |
| Within Groups  | 2.275          | 20 | .114        |         |      |
| Total          | 118.600        | 24 |             |         |      |

**Table S2 Tukey test table for tensile properties of PP/HDPE Composites**

Maximum\_Deformation\_Ten

Tukey B<sup>a</sup>

| Specimen_Code | N | Subset for alpha = 0.05 |        |        |        |
|---------------|---|-------------------------|--------|--------|--------|
|               |   | 1                       | 2      | 3      | 4      |
| T3            | 5 | 1.4871                  |        |        |        |
| T4            | 5 | 1.5838                  |        |        |        |
| T2            | 5 |                         | 2.3720 |        |        |
| T5            | 5 |                         |        | 2.9833 |        |
| T1            | 5 |                         |        |        | 7.3230 |

Means for groups in homogeneous subsets are displayed.

a. Uses Harmonic Mean Sample Size = 5.000.

Table S3 Anova table for flexural properties of PP/HDPE Composites

**ANOVA**

Maximum\_Deformation\_Flx

|                | Sum of Squares | df | Mean Square | F      | Sig. |
|----------------|----------------|----|-------------|--------|------|
| Between Groups | 44.137         | 4  | 11.034      | 30.962 | .000 |
| Within Groups  | 7.128          | 20 | .356        |        |      |
| Total          | 51.264         | 24 |             |        |      |

Table S4 Tukey test table for flexural properties of PP/HDPE Composites

**Maximum\_Deformation\_Flx**Tukey B<sup>a</sup>

| Specimen_Code | N | Subset for alpha = 0.05 |        |        |        |
|---------------|---|-------------------------|--------|--------|--------|
|               |   | 1                       | 2      | 3      | 4      |
| T4            | 5 | 4.1284                  |        |        |        |
| T3            | 5 | 4.7386                  | 4.7386 |        |        |
| T5            | 5 |                         | 5.3036 | 5.3036 |        |
| T2            | 5 |                         |        | 6.1872 |        |
| T1            | 5 |                         |        |        | 7.9464 |

Means for groups in homogeneous subsets are displayed.

a. Uses Harmonic Mean Sample Size = 5.000.

Table S5 Anova table for tensile properties of braid and filament configurations

**ANOVA**

Maximum\_Deformation

|                | Sum of Squares | df | Mean Square | F      | Sig. |
|----------------|----------------|----|-------------|--------|------|
| Between Groups | 240.068        | 3  | 80.023      | 13.225 | .000 |
| Within Groups  | 96.811         | 16 | 6.051       |        |      |
| Total          | 336.879        | 19 |             |        |      |

Table S6 Tukey test table for tensile properties of braid and filament configurations

**Maximum\_Deformation**Tukey HSD<sup>a</sup>

| Configuration   | N | Subset for alpha =<br>0.05 |                            |
|-----------------|---|----------------------------|----------------------------|
|                 |   | 1                          | 2                          |
| Filament of 3mm | 5 | 8.1240                     | 14.8960<br>15.8360<br>.929 |
| Filament of 2mm | 5 | 8.8520                     |                            |
| Quad braid      | 5 |                            |                            |
| Triple braid    | 5 |                            |                            |
| Sig.            |   | .965                       |                            |

Means for groups in homogeneous subsets are displayed.

a. Uses Harmonic Mean Sample Size = 5.000.

Table S7 Anova table for tensile properties of sheet configuration

**ANOVA**

Maximum\_Deformation

|                | Sum of Squares | df | Mean Square | F       | Sig. |
|----------------|----------------|----|-------------|---------|------|
| Between Groups | 49.062         | 1  | 49.062      | 131.457 | .000 |
| Within Groups  | 2.986          | 8  | .373        |         |      |
| Total          | 52.048         | 9  |             |         |      |

Table S8 Anova table for tensile properties of rhombohedral and trigonal geogrids

**ANOVA**

Elastic\_Limit\_Strength

|                | Sum of Squares | df | Mean Square | F      | Sig. |
|----------------|----------------|----|-------------|--------|------|
| Between Groups | 5953.112       | 1  | 5953.112    | 47.002 | .000 |
| Within Groups  | 1013.252       | 8  | 126.656     |        |      |
| Total          | 6966.364       | 9  |             |        |      |

Table S9 Anova table for tensile properties of rhombohedral and trigonal geogrids

**ANOVA**

Maximum\_Strength

|                | Sum of Squares | df | Mean Square | F      | Sig. |
|----------------|----------------|----|-------------|--------|------|
| Between Groups | 115962.746     | 1  | 115962.746  | 11.020 | .011 |
| Within Groups  | 84183.651      | 8  | 10522.956   |        |      |
| Total          | 200146.397     | 9  |             |        |      |
